# Supplementary material
Source: PubMed Central journal article supplement (PMC3040479)
Supplement: 97320630005168S1.pdf [file 97320630005168S1.pdf]

### Supplementary material:

**Genetic algorithm methodology to optimize the objection function that is [RA]t, carried out 200 iterations of optimization. Results are as follows:**

Optimization:

Maximize [RA]t

Method: Genetic algorithm

Generations = 200  
 Iterations = 200  
 Simulations = 2048  
 Time = 31 s  
 Speed = 66.0323 simulation/s

Best solution:

[RA]t = 0.00632031  
 [3C4HPLA]i = 0.025

**Table 1: Metabolites and their initial concentrations (in mM)**

| Metabolites                                       | Initial Concentration in mM (Approx) |
|---------------------------------------------------|--------------------------------------|
| L-Phenylalanine (L-Phe)                           | 1.394000e-002                        |
| t- Cinnamic acid (t-CA)                           | 1.250000e-002                        |
| 4- Coumaric acid (4CouA)                          | 1.385000e-002                        |
| 4-Coumaroyl- CoA (4CouCoA)                        | 1.538000e-002                        |
| L-tyrosine (L-Tyr)                                | 1.519000e-002                        |
| 4-Hydroxyphenylpyruvic acid (4HPA)                | 1.527000e-002                        |
| 4-Hydroxyphenyllactic acid (4HPLA)                | 1.538000e-002                        |
| 4-Coumaroyl-4'-hydroxyphenyllactic acid (4C4HPLA) | 1.542000e-002                        |
| Caffeoyl-4'hydroxyphenyllactic acid (3C4HPLA)     | 1.526000e-002                        |
| Caffeoyl-3'-4'hydroxyphenyllactic acid (3'C4HPLA) | 1.526000e-002                        |
| Rosmarinic acid (RA)                              | 0.0                                  |

**Table 2: Results of integration (after 5.00e+002 s)**

|            |      |                                                      |                           |        |
|------------|------|------------------------------------------------------|---------------------------|--------|
| [ L        | Phe] | initial = 1.394000e                                  | 002 mM, final = 5.714014e | 152 mM |
| [ t        | CA]  | initial = 1.250000e                                  | 002 mM, final = 4.960081e | 151 mM |
| [ 4CouA]   |      | initial = 1.385000e                                  | 002 mM, final = 7.150533e | 149 mM |
| [ CAH]     |      | initial = 1.000000e                                  | 002 mM, final = 1.000000e | 002 mM |
| [ 4CL]     |      | initial = 1.000000e                                  | 002 mM, final = 1.000000e | 002 mM |
| [4CouCoA]  |      | initial = 1.538000e                                  | 005 mM, final = 3.342895e | 004 mM |
| [ LTyr]    |      | initial = 1.519000e                                  | 002 mM, final = 2.373387e | 141 mM |
| [ TAT]     |      | initial = 1.000000e                                  | 002 mM, final = 1.000000e | 002 mM |
| [ 4HPA]    |      | initial = 1.527000e                                  | 002 mM, final = 1.595839e | 138 mM |
| [ HPPR]    |      | initial = 1.000000e                                  | 002 mM, final = 1.000000e | 002 mM |
| [ 4HPLA]   |      | initial = 1.538000e                                  | 002 mM, final = 5.868909e | 003 mM |
| [4C4HPLA]  |      | initial = 1.542000e                                  | 002 mM, final = 1.535336e | 006 mM |
| [ RA]      |      | <b>initial = 0.000000e+000 mM, final = 4.047119e</b> | <b>002 mM</b>             |        |
| [3C4HPLA]  |      | initial = 1.526000e                                  | 002 mM, final = 2.483589e | 003 mM |
| [3'C4HPLA] |      | initial = 1.526000e                                  | 002 mM, final = 2.483589e | 003 mM |
| [ RAS]     |      | initial = 1.000000e                                  | 002 mM, final = 1.000000e | 002 mM |
| [ P450]    |      | initial = 1.000000e                                  | 002 mM, final = 1.000000e | 002 mM |
| [ PAL]     |      | initial = 1.000000e                                  | 002 mM, final = 1.000000e | 002 mM |

**Table 3: Change in the concentration of the metabolites with time.**

| Real time       | [4HPLA]t        | [3C4HPLA]t      | [RA]t           | J(R9)           |
|-----------------|-----------------|-----------------|-----------------|-----------------|
| <b>1.60E-0</b>  | <b>1.54E-02</b> | <b>1.53E-02</b> | <b>0.00E+00</b> | <b>2.33E-04</b> |
| 3.10E-02        | 3.80E-02        | 2.17E-02        | 4.39E-03        | 4.69E-04        |
| 1.00E+01        | 2.94E-02        | 2.17E-02        | 9.18E-03        | 4.72E-04        |
| 2.00E+01        | 2.38E-02        | 2.02E-02        | 1.36E-02        | 4.07E-04        |
| 3.00E+01        | 2.02E-02        | 1.83E-02        | 1.73E-02        | 3.36E-04        |
| 4.00E+01        | 1.77E-02        | 1.66E-02        | 2.04E-02        | 2.75E-04        |
| 5.00E+01        | 1.58E-02        | 1.50E-02        | 2.29E-02        | 2.26E-04        |
| 6.00E+01        | 1.44E-02        | 1.37E-02        | 2.49E-02        | 1.88E-04        |
| 7.00E+01        | 1.32E-02        | 1.26E-02        | 2.67E-02        | 1.58E-04        |
| 8.00E+01        | 1.23E-02        | 1.16E-02        | 2.81E-02        | 1.34E-04        |
| 9.00E+01        | 1.16E-02        | 1.07E-02        | 2.94E-02        | 1.15E-04        |
| 1.00E+02        | 1.09E-02        | 9.98E-03        | 3.04E-02        | 9.97E-05        |
| 1.10E+02        | 1.04E-02        | 9.33E-03        | 3.14E-02        | 8.70E-05        |
| 1.20E+02        | 9.91E-03        | 8.75E-03        | 3.22E-02        | 7.65E-05        |
| 1.30E+02        | 9.51E-03        | 8.23E-03        | 3.29E-02        | 6.78E-05        |
| 1.40E+02        | 9.15E-03        | 7.77E-03        | 3.35E-02        | 6.04E-05        |
| 1.50E+02        | 8.84E-03        | 7.36E-03        | 3.41E-02        | 5.41E-05        |
| 1.60E+02        | 8.57E-03        | 6.98E-03        | 3.46E-02        | 4.87E-05        |
| 1.70E+02        | 8.32E-03        | 6.64E-03        | 3.51E-02        | 4.41E-05        |
| 1.80E+02        | 8.10E-03        | 6.33E-03        | 3.55E-02        | 4.01E-05        |
| 1.90E+02        | 7.90E-03        | 6.05E-03        | 3.59E-02        | 3.66E-05        |
| 2.00E+02        | 7.73E-03        | 5.79E-03        | 3.62E-02        | 3.35E-05        |
| 2.10E+02        | 7.56E-03        | 5.55E-03        | 3.66E-02        | 3.08E-05        |
| 2.20E+02        | 7.42E-03        | 5.33E-03        | 3.68E-02        | 2.84E-05        |
| 2.30E+02        | 7.28E-03        | 5.12E-03        | 3.71E-02        | 2.62E-05        |
| 2.40E+02        | 7.16E-03        | 4.93E-03        | 3.74E-02        | 2.43E-05        |
| 2.50E+02        | 7.05E-03        | 4.75E-03        | 3.76E-02        | 2.26E-05        |
| 2.60E+02        | 6.95E-03        | 4.59E-03        | 3.78E-02        | 2.10E-05        |
| 2.70E+02        | 6.85E-03        | 4.43E-03        | 3.80E-02        | 1.96E-05        |
| 2.80E+02        | 6.77E-03        | 4.28E-03        | 3.82E-02        | 1.83E-05        |
| 2.90E+02        | 6.69E-03        | 4.15E-03        | 3.84E-02        | 1.72E-05        |
| 3.00E+02        | 6.61E-03        | 4.02E-03        | 3.86E-02        | 1.61E-05        |
| 3.10E+02        | 6.54E-03        | 3.89E-03        | 3.87E-02        | 1.52E-05        |
| 3.20E+02        | 6.48E-03        | 3.78E-03        | 3.89E-02        | 1.43E-05        |
| 3.30E+02        | 6.42E-03        | 3.67E-03        | 3.90E-02        | 1.35E-05        |
| 3.40E+02        | 6.37E-03        | 3.57E-03        | 3.91E-02        | 1.27E-05        |
| 3.50E+02        | 6.32E-03        | 3.47E-03        | 3.93E-02        | 1.20E-05        |
| 3.60E+02        | 6.27E-03        | 3.38E-03        | 3.94E-02        | 1.14E-05        |
| 3.70E+02        | 6.22E-03        | 3.29E-03        | 3.95E-02        | 1.08E-05        |
| 3.80E+02        | 6.18E-03        | 3.20E-03        | 3.96E-02        | 1.03E-05        |
| 3.90E+02        | 6.14E-03        | 3.12E-03        | 3.97E-02        | 9.75E-06        |
| 4.00E+02        | 6.11E-03        | 3.05E-03        | 3.98E-02        | 9.27E-06        |
| 4.10E+02        | 6.07E-03        | 2.97E-03        | 3.99E-02        | 8.83E-06        |
| 4.20E+02        | 6.04E-03        | 2.90E-03        | 4.00E-02        | 8.42E-06        |
| 4.30E+02        | 6.01E-03        | 2.83E-03        | 4.00E-02        | 8.03E-06        |
| 4.40E+02        | 5.98E-03        | 2.77E-03        | 4.01E-02        | 7.67E-06        |
| 4.50E+02        | 5.96E-03        | 2.71E-03        | 4.02E-02        | 7.33E-06        |
| 4.60E+02        | 5.93E-03        | 2.65E-03        | 4.03E-02        | 7.01E-06        |
| 4.70E+02        | 5.91E-03        | 2.59E-03        | 4.03E-02        | 6.71E-06        |
| 4.80E+02        | 5.89E-03        | 2.54E-03        | 4.04E-02        | 6.43E-06        |
| <b>4.90E+02</b> | <b>5.87E-03</b> | <b>2.48E-03</b> | <b>4.05E-02</b> | <b>6.17E-06</b> |
